# Supplementary material for: The Molecular Basis of Retinal Dystrophies in Pakistan
Source: MDPI journal article supplement (doi:10.3390/genes5010176), 2014-03-11
Supplement: s1 [file s1]

## Supplementary Information

**Table S1.** *In silico* pathogenicity prediction of variants identified in Pakistani individuals with non-syndromic retinal dystrophies and their frequencies in normal individuals.

| Gene          | RefSeq Id      | Nucleotide variant | Protein variant | PhyloP | Grantham distance | PolyPhen                 | SIFT               | EVS               |
|---------------|----------------|--------------------|-----------------|--------|-------------------|--------------------------|--------------------|-------------------|
| <i>AIPL1</i>  | NM_201253.2    | c.116C>A           | p.(Thr39Asp)    | 3.60   | 65                | Probably damaging (1.00) | Deleterious (0.01) | Absent            |
| <i>BEST1</i>  | NM_001139443.1 | c.418C>G           | p.(Leu140Val)   | 1.34   | 32                | Probably damaging (1.00) | Deleterious (0.03) | Absent            |
| <i>CERKL</i>  | NM_001030311.2 | c.316C>A           | p.(Arg106Ser)   | 4.48   | 110               | Probably damaging (1.00) | Tolerated (0.82)   | Absent            |
| <i>CLRN1</i>  | NM_174878.2    | c.92C>T            | p.(Pro31Leu)    | 2.14   | 98                | Probably damaging (0.98) | Deleterious (0.04) | Absent            |
| <i>CLRN1</i>  | NM_174878.2    | c.461T>G           | p.(Leu154Trp)   | 4.48   | 61                | Probably damaging (1.00) | Deleterious (0.00) | Absent            |
| <i>CNGA1</i>  | NM_00142564.1  | c.1298G>A          | p.(Gly433Asp)   | 5.77   | 94                | Probably damaging (1.00) | Deleterious (0.00) | Absent            |
| <i>CNGA3</i>  | NM_001298.2    | c.822G>T           | p.(Arg274Ser)   | 0.21   | 110               | Probably damaging (1.00) | Deleterious (0.00) | Absent            |
| <i>CNGA3</i>  | NM_001298.2    | c.827A>G           | p.(Asn276Ser)   | 4.73   | 46                | Probably damaging (0.99) | Deleterious (0.00) | Absent            |
| <i>CNGB1</i>  | NM_001297.4    | c.2284C>T          | p.(Arg762Cys)   | 1.58   | 180               | Probably damaging (1.00) | Deleterious (0.00) | Absent            |
| <i>CRB1</i>   | NM_201253.2    | c.2234C>T          | p.(Thr745Met)   | 4.16   | 81                | Probably damaging (1.00) | Deleterious (0.00) | T = 1; C = 13,005 |
| <i>CRB1</i>   | NM_201253.2    | c.2536G>A          | p.(Gly846Arg)   | 3.76   | 125               | Probably damaging (1.00) | Deleterious (0.00) | Absent            |
| <i>CRB1</i>   | NM_201253.2    | c.3101T>C          | p.(Leu989Thr)   | 4.64   | 89                | Probably damaging (0.95) | Deleterious (0.00) | Absent            |
| <i>CRB1</i>   | NM_201253.2    | c.3296C>A          | p.(Thr1099Lys)  | 2.95   | 78                | Probably damaging (0.98) | Deleterious (0.00) | Absent            |
| <i>CRB1</i>   | NM_201253.2    | c.3347T>C          | p.(Leu1071Pro)  | 4.73   | 98                | Probably damaging (1.00) | Deleterious (0.00) | Absent            |
| <i>CRB1</i>   | NM_201253.2    | c.3962G>C          | p.(Cys1321Ser)  | 4.32   | 112               | Probably damaging (0.85) | Deleterious (0.00) | Absent            |
| <i>EYS</i>    | NM_001142800.1 | c.8299G>T          | p.(Asp2767Tyr)  | 2.71   | 160               | Probably damaging (1.00) | Deleterious (0.01) | Absent            |
| <i>GNAT1</i>  | NM_144499.2    | c.386A>G           | p.(Asp129Gly)   | 4.64   | 94                | Probably damaging (1.00) | Deleterious (0.00) | Absent            |
| <i>NMNAT1</i> | NM_022787.3    | c.25G>A            | p.(Val9Met)     | 2.38   | 21                | Probably damaging (0.98) | Deleterious (0.02) | Absent            |
| <i>PDE6A</i>  | NM_000440.2    | c.889C>T           | p.(Gly297Ser)   | 5.45   | 56                | Probably damaging (1.00) | Tolerated (0.12)   | Absent            |
| <i>PDE6A</i>  | NM_000440.2    | c.1630C>T          | p.(Arg544Trp)   | 1.98   | 101               | Probably damaging (0.99) | Deleterious (0.02) | A = 1; G = 13,005 |
| <i>PDE6B</i>  | NM_000283.3    | c.1160C>T          | p.(Pro387Leu)   | 5.29   | 98                | Probably damaging (1.00) | Deleterious (0.01) | Absent            |
| <i>PDE6B</i>  | NM_000283.3    | c.1655G>A          | p.(Arg552Gln)   | 4.56   | 43                | Probably damaging (0.99) | Tolerated (0.06)   | Absent            |
| <i>RDH12</i>  | NM_152443.2    | c.506G>A           | p.(Arg169Gln)   | 6.26   | 43                | Probably damaging (1.00) | Deleterious (0.00) | Absent            |
| <i>RDH12</i>  | NM_152443.2    | c.619A>G           | p.(Asn207Asp)   | 3.68   | 23                | Probably damaging (0.95) | Deleterious (0.00) | Absent            |
| <i>RDH5</i>   | NM_001199771.1 | c.758T>G           | p.(Met253Arg)   | 4.40   | 91                | Probably damaging (0.98) | Deleterious (0.05) | Absent            |

Table S1. Cont.

| Gene           | RefSeq Id   | Nucleotide variant | Protein variant | PhyloP | Grantham distance | PolyPhen                 | SIFT               | EVS    |
|----------------|-------------|--------------------|-----------------|--------|-------------------|--------------------------|--------------------|--------|
| <i>RHO</i>     | NM_000539.3 | c.448G>A           | p.(Glu150Lys)   | 4.24   | 56                | Probably damaging (0.99) | Deleterious (0.00) | Absent |
| <i>RLBP1</i>   | NM_000326.4 | c.346G>C           | p.(Gly116Arg)   | 5.45   | 125               | Probably damaging (1.00) | Tolerated (0.18)   | Absent |
| <i>RPE65</i>   | NM_000329.2 | c.131G>A           | p.(Arg44Gln)    | 5.77   | 43                | Probably damaging (1.00) | Deleterious (0.02) | Absent |
| <i>RPE65</i>   | NM_000329.2 | c.751G>T           | p.(Val251Phe)   | 6.26   | 50                | Probably damaging (1.00) | Deleterious (0.03) | Absent |
| <i>RPGRIP1</i> | NM_020366.3 | c.2480G>T          | p.(Arg827Leu)   | 0.85   | 102               | Probably damaging (0.99) | Deleterious (0.02) | Absent |
| <i>SEMA4A</i>  | NM_022367.3 | c.1033G>C          | p.(Asp345His)   | 2.14   | 81                | Probably damaging (0.99) | Deleterious (0.01) | Absent |
| <i>SEMA4A</i>  | NM_022367.3 | c.1049T>G          | p.(Phe350Cys)   | 4.24   | 205               | Probably damaging (1.00) | Deleterious (0.03) | Absent |
| <i>TULP1</i>   | NM_003322.3 | c.1138A>G          | p.(Thr380Ala)   | 2.87   | 58                | Benign (0.23)            | Deleterious (0.00) | Absent |
| <i>TULP1</i>   | NM_003322.3 | c.1445G>A          | p.(Arg482Gln)   | 6.10   | 43                | Probably damaging (1.00) | Deleterious (0.00) | Absent |
| <i>TULP1</i>   | NM_003322.3 | c.1466A>G          | p.(Lys489Arg)   | 4.97   | 26                | Probably damaging (0.99) | Deleterious (0.00) | Absent |
| <i>ZNF513</i>  | NM_144631.5 | c.1015T>C          | p.(Cys339Arg)   | 1.98   | 180               | Probably damaging (0.99) | Deleterious (0.00) | Absent |

EVS, exome variant server; PolyPhen, polymorphism phenotyping; SIFT, sorting tolerant from intolerant.

**Table S2.** *In silico* analysis of variants identified in Pakistani individuals with syndromic retinal dystrophies and their frequencies in normal individuals.

| Gene          | RefSeq Id    | Nucleotide variant | Protein variant | PhyloP | Grantham distance | Polyphen                 | SIFT               | EVS    |
|---------------|--------------|--------------------|-----------------|--------|-------------------|--------------------------|--------------------|--------|
| <i>ARL6</i>   | NM_032146.3  | c.281T>C           | p.(Ile94Thr)    | 4.56   | 89                | Probably damaging (0.97) | Deleterious (0.01) | Absent |
| <i>ARL13B</i> | NM_182896.2  | c.236G>A           | p.(Arg79Gln)    | 6.34   | 43                | Probably damaging (1.00) | Tolerated (0.16)   | Absent |
| <i>BBS1</i>   | NM_02464.9.4 | c.442G>A           | p.(Asp148Asn)   | 3.51   | 23                | Probably damaging (1.00) | Tolerated (0.50)   | Absent |
| <i>BBS5</i>   | NM_152384.2  | c.2T>A             | p.(Met1Lys)     | 1.82   | 95                | Probably damaging (1.00) | Deleterious (0.00) | Absent |
| <i>BBS12</i>  | NM_152618.2  | c.1589T>C          | p.(Leu530Pro)   | 4.73   | 98                | Probably damaging (1.00) | Deleterious (0.00) | Absent |
| <i>CDH23</i>  | NM_022124.5  | c.7198C>T          | p.(Pro2400Ser)  | 6.10   | 74                | Probably damaging (1.00) | Deleterious (0.00) | Absent |
| <i>CDH23</i>  | NM_022124.5  | c.8150A>G          | p.(Asp2717Gly)  | 4.89   | 94                | Probably damaging (1.00) | Deleterious (0.00) | Absent |
| <i>TMEM67</i> | NM_153704.5  | c.1127A>C          | p.(Gln376Pro)   | 4.24   | 76                | Probably damaging (0.99) | Tolerated (0.15)   | Absent |

EVS, exome variant server; PolyPhen, polymorphism phenotyping; SIFT, sorting tolerant from intolerant.
